# Supplementary material for: Targeting ERBB3 and AKT to overcome adaptive resistance in EML4-ALK-driven non-small cell lung cancer
Source: Cell Death Dis. 2024 Dec 18;15(12):912. doi: 10.1038/s41419-024-07272-7 (PMC11655848; doi:10.1038/s41419-024-07272-7)
Supplement: Supplementary file 4 — Dataset 1 [file 41419_2024_7272_MOESM4_ESM.xlsx]

## Sheet: H3122 PTK_Significant
	PamGrid Version	H3122	BioNavigator Version		6.3.67.0
ID	UniprotAccession	MTvC::__LogFC	MTvC::__pvalue.treatment
CDK7_157_169	P50613	-1.87947	0.00438
EPHB1_921_933	P54762	-1.15942	0.0119
NCF1_313_325	P14598	-1.08339	0.0395
VISTA_260_270	Q9H7M9	-0.882886	0.00127
DCX_67_79	O43602	-0.548716	0.0301
VGFR2_944_956	P35968	-0.468339	0.0207
PTN11_539_551	Q06124	-0.45109	0.0479
MK08_181_191	P45983	-0.41505	0.0336
RAF1_332_344	P04049	0.539709	0.0156
ZBT16_621_633	Q05516	0.633475	0.0371
PTN11_57_67	Q06124	0.893784	0.00751
ARAF_297_307	P10398	0.930325	0.0417
FAK1_569_581	Q05397	0.961377	0.00162
PRRX2_202_214	Q99811	0.991535	0.0352
MK03_199_208	P27361	1.03288	0.0106
IRS1_890_902	P35568	1.07107	0.00662
FAK2_572_584	Q14289	1.07782	0.00198
IRS2_626_638	Q9Y4H2†	1.08344	0.00713
TEC_512_524	P42680	1.10606	0.0089
MET_1227_1239	P08581	1.13661	0.000738
PDPK1_2_14	O15530	1.17072	0.00198
EGFR_1165_1177	P00533	1.21179	0.00479
K2C8_425_437	P05787	1.24808	0.0281
PGFRB_572_584	P09619	1.32819	0.00106
LAT_249_261	O43561	1.33212	0.00191
RASA1_453_465	P20936	1.39334	0.000545
MK12_178_190	P53778	1.40994	0.0207
CDK1_9_21	P06493	1.45053	0.00073
MET_1228_1240	P08581	1.45252	0.00129
MPZL1_236_246	O95297	1.50626	0.00469
EFS_246_258	O43281	1.51457	0.00117
PLCG1_764_776	P19174	1.51735	0.000717
MK14_177_187	Q16539	1.55029	0.0415
ENOG_37_49	P09104	1.56152	0.00239
LAT_194_206	O43561	1.57022	0.00569
VGFR3_1061_1073	P35916	1.58696	0.0499
ZAP70_313_325	P43403	1.59777	0.000835
HAVR2_257_267	Q8TDQ0	1.64061	0.00049
JAK3_974_986	P52333††	1.64113	0.00308
PTN11_580_590	Q06124	1.64129	0.00029
PAXI_24_36	P49023	1.66223	0.000656
41_654_666	P11171	1.67259	0.000637
AKT1_309_321_C310S	P31749	1.68731	0.00182
PECA1_708_718	P16284	1.72154	0.000448
PAXI_111_123	P49023	1.72262	0.000427
PTN6_558_570	P29350	1.72376	0.000255
PTN6_531_541	P29350	1.73815	0.000646
PLCG2_1191_1203_C1200S	P16885	1.74507	0.000195
PECA1_706_718	P16284	1.76455	0.000457
PGFRB_709_721	P09619	1.76846	0.00587
PDPK1_369_381	O15530	1.79034	0.00109
JAK2_563_577	O60674	1.79926	0.0339
VGFR2_989_1001	P35968	1.85274	0.000298
CD79A_181_193	P11912	1.8665	0.00104
PGFRB_1014_1028	P09619	1.87666	0.00126
CDK2_8_20	P24941	1.89452	0.000701
TYK2_1048_1060	†P29597	1.92046	0.00102
CD3E_182_194	P07766	2.02787	0.000231
CALM_95_107	P0DP23	2.03284	0.00133
RET_1022_1034	P07949	2.05825	0.0005
RON_1346_1358	Q04912	2.06368	0.0124
PGFRB_768_780	P09619	2.07191	0.00278
FGFR2_762_774	P21802	2.15324	0.000342
FGFR3_753_765	P22607	2.15365	0.00113
PRGR_786_798	P06401	2.15451	0.0116
FRK_380_392	P42685	2.15904	0.000203
P85A_600_612	P27986	2.18354	0.000379
ZAP70_485_497	P43403	2.18783	0.00164
EPOR_419_431	P19235	2.20921	0.0034
CDK4_11_23	P11802	2.21059	0.000247
PGFRB_771_783	P09619	2.23749	0.00409
ANXA1_14_26	P04083	2.27888	0.00235
EPHA7_607_619	Q15375	2.28819	0.000325
EGFR_1103_1115	P00533	2.29556	0.00367
VGFR1_1040_1052	P17948	2.3525	0.012
EPOR_361_373	P19235	2.35975	0.000587
FER_707_719	P16591	2.4014	0.000117
CTNB1_79_91	P35222	2.48656	0.0393
CBL_693_705	P22681	2.53365	0.0028
PGFRB_1002_1014	P09619	2.54533	0.00169
FES_706_718	P07332	2.56212	4.98e-05
JAK1_ 1027_1039	P23458	2.59692	8.56e-05
CD3Z_135_147	P20963	2.60705	0.000121
ERBB2_1241_1253	P04626	2.61861	0.000601
EPHB1_771_783	P54762	2.62786	0.000212
EPHA2_765_777	P29317	2.68768	7.32e-05
KSYK_518_530	P43405	2.70532	0.000483
ERBB4_1277_1289	Q15303	2.78428	1.72e-06
CD3Z_117_129	P20963	2.87261	0.0244
MK07_ 212_224	Q13164	2.90272	0.000194
EGFR_1190_1202	P00533	2.94649	0.000244
EPHA1_774_786	P21709	3.13746	7.79e-05
FGFR1_761_773	P11362	3.31016	0.00117
MK14_173_185	Q16539	3.34152	0.000771
C1R_199_211	P00736	3.70188	0.000374
GAB1_622_632	Q13480	3.73288	0.000166
ERBB2_870_882	P04626	3.88413	0.000327
GAB2_638_648	Q9UQC2	3.96232	0.00074
YES_420_432	P07947	4.29486	4.34e-05
ERBB3_1283_1295	†P21860	4.43093	8.58e-05
INSR_992_1004	P06213	4.47198	0.00352
LYN_391_403	P07948†	4.47993	0.00227
LCK_387_399	P06239	4.76678	1.72e-06
CD3Z_105_117	P20963	4.81489	0.00015

## Sheet: H2228 PTK_Significant
	PamGrid Version	H2228	BioNavigator Version	6.3.67.0
ID	UniprotAccession	MTvC::__LogFC	MTvC::__pvalue.treatment
DYR1A_212_224	Q13627	-1.32148	0.0441
PTN11_541_551	Q06124	-0.895872	0.00816
K2C6B_53_65	P04259	-0.472346	0.0126
PTN11_539_551	Q06124	-0.423555	0.0464
DYR1A_312_324	Q13627	-0.377051	0.00819
MK01_180_192	P28482	-0.298769	0.00731
RAF1_332_344	P04049	0.308033	0.0483
CD3E_193_205	P07766	0.402295	0.0378
PDPK1_2_14	O15530	0.460361	0.00366
FAK2_572_584	Q14289	0.490041	0.00338
TEC_512_524	P42680	0.495055	0.0271
MBP_198_210	P02686	0.523472	0.0141
MET_1227_1239	P08581	0.57644	0.0219
FAK1_569_581	Q05397	0.616113	0.00659
PGFRB_1014_1028	P09619	0.619631	0.00857
VGFR2_989_1001	P35968	0.639435	0.0343
AKT1_320_332	P31749	0.664605	0.0151
PRRX2_202_214	Q99811	0.675573	0.000428
PLCG1_764_776	P19174	0.691694	0.0117
ENOG_37_49	P09104	0.699154	0.0318
PGFRB_572_584	P09619	0.711375	0.0055
PTN11_580_590	Q06124	0.719536	0.0258
CDK1_9_21	P06493	0.723183	0.041
PGFRB_709_721	P09619	0.735239	0.00025
ZAP70_313_325	P43403	0.749441	0.0107
PECA1_708_718	P16284	0.751371	0.0311
HAVR2_257_267	Q8TDQ0	0.796901	0.0395
EPOR_419_431	P19235	0.818554	0.0115
CD79A_181_193	P11912	0.820888	0.000834
P85A_600_612	P27986	0.83681	0.0166
K2C8_425_437	P05787	0.84653	0.0105
PECA1_706_718	P16284	0.847257	0.00674
PAXI_24_36	P49023	0.850656	0.00093
EPHA2_765_777	P29317	0.860435	0.0092
CDK4_11_23	P11802	0.860701	0.0216
JAK3_974_986	P52333††	0.889199	0.00121
PAXI_111_123	P49023	0.899762	0.00144
FRK_380_392	P42685	0.900469	0.00466
PGFRB_768_780	P09619	0.91027	0.00114
ANXA1_14_26	P04083	0.91824	0.0173
MPZL1_236_246	O95297	0.918328	0.0174
RASA1_453_465	P20936	0.933113	0.000803
41_654_666	P11171	0.945994	0.00148
EFS_246_258	O43281	0.956374	0.000467
CD3Z_77_89	P20963	0.967914	0.000361
RET_1022_1034	P07949	1.00682	0.000972
EPHA1_774_786	P21709	1.03708	0.00891
CDK2_8_20	P24941	1.04008	0.00224
EPHB1_771_783	P54762	1.05015	0.000627
EPOR_361_373	P19235	1.07611	0.000732
FGFR2_762_774	P21802	1.11529	0.00131
FER_707_719	P16591	1.11936	0.000899
FES_706_718	P07332	1.12056	0.00129
ZAP70_485_497	P43403	1.15183	0.000438
JAK1_ 1027_1039	P23458	1.15766	0.000979
EPHA7_607_619	Q15375	1.17301	0.000149
CD3E_182_194	P07766	1.23353	0.000281
FGFR3_753_765	P22607	1.31746	0.00777
AKT1_309_321_C310S	P31749	1.32707	0.000299
CBL_693_705	P22681	1.33072	0.00114
CD3Z_135_147	P20963	1.35916	0.000905
VGFR1_1040_1052	P17948	1.37091	0.0164
KIT_930_942_C942S	†P10721†	1.37722	0.000448
LCK_387_399	P06239	1.39877	0.0016
ERBB2_1241_1253	P04626	1.4059	0.00302
RON_1346_1358	Q04912	1.41255	0.00111
PGFRB_1002_1014	P09619	1.42127	9.68e-05
YES_420_432	P07947	1.42735	0.00538
PRGR_786_798	P06401	1.44414	0.0293
MK12_178_190	P53778	1.51047	0.0157
JAK2_563_577	O60674	1.58386	0.00111
CD3Z_105_117	P20963	1.62475	0.0011
ERBB2_870_882	P04626	1.6354	0.00156
LYN_391_403	P07948†	1.76703	0.00729
CALM_95_107	P0DP23	1.79922	0.000152
NTRK1_489_501	P04629	1.89677	0.0439
ANXA2_17_29	P07355	1.97534	0.00364
PDCD1_221_229_FS219_220KK	Q15116	2.07948	0.0245
STAT4_714_726	Q14765	2.43368	0.00285
MK14_177_187	Q16539	2.49477	0.00327
ERBB4_1277_1289	Q15303	2.54918	0.00376
CTNB1_79_91	P35222	2.79968	0.00501
INSR_992_1004	P06213	2.86586	0.00468
VGFR2_1046_1058	P35968	2.89423	0.00999
EGFR_1103_1115	P00533	3.36892	0.00321
PGFRB_771_783	P09619	3.71221	0.000715
CD3Z_116_128	P20963	3.81157	0.00442
FGFR1_761_773	P11362	3.90813	0.000248
CRK_214_226	P46108	4.17909	2.57e-06
CD3Z_117_129	P20963	4.28302	0.00167
