# Supplementary material for: Targeting ERBB3 and AKT to overcome adaptive resistance in EML4-ALK-driven non-small cell lung cancer
Source: Cell Death Dis. 2024 Dec 18;15(12):912. doi: 10.1038/s41419-024-07272-7 (PMC11655848; doi:10.1038/s41419-024-07272-7)
Supplement: Supplementary file 6 — Dataset 3 [file 41419_2024_7272_MOESM6_ESM.xlsx]

## Sheet: UKA_PTK_03_H3122 T3 vs C-UKAv20
Kinase Uniprot ID	Kinase Name	Kinase Group	Kinase Family	Mean Specificity Score	Mean Significance Score	Mean Final Score	Median Final score	Mean Kinase Statistic	Median Kinase Statistic	SD Kinase Statitistic	Mean peptide set size
O14757	CHK1	CAMK	CAMKL	2.69897	0.974694	3.67366	3.67366	5.7158	5.7158	0	3
P06239	Lck	TK	Src	2.63207	0.974694	3.60677	3.67366	2.99279	3.02044	0.063786	26.3333
P07948	Lyn	TK	Src	2.66552	0.974694	3.64022	3.67366	3.10735	3.1069	0.135985	22.2222
P08631	HCK	TK	Src	2.69897	0.974694	3.67366	3.67366	3.28715	3.11023	0.3472	21
P12931	Src	TK	Src	2.4656	0.974694	3.44029	3.67366	2.76055	2.7689	0.0306632	39.8889
P16234	PDGFR[alpha]	TK	PDGFR	2.23597	0.974694	3.21067	3.37263	4.23493	4.30638	0.214341	4.11111
P51451	BLK	TK	Src	2.00443	0.974694	2.97913	3.37263	2.91314	2.88713	0.210962	20.5556
P06213	InSR	TK	InsR	2.02127	0.974694	2.99596	3.19654	2.96175	2.91015	0.081262	17.3333
P07947	Yes	TK	Src	1.87164	0.974694	2.84633	2.82857	2.83339	2.77956	0.141244	23.3333
P09769	Fgr	TK	Src	1.56646	0.974694	2.54115	2.44322	3.10836	3.10175	0.0998624	9.66667
P30530	Axl	TK	Axl	1.26438	0.974694	2.23908	2.15515	2.32755	2.34227	0.0907754	53.2222
P06241	Fyn	TK	Src	1.17145	0.974694	2.14615	2.0716	2.5669	2.52944	0.0850496	22.2222
P42684	Arg	TK	Abl	1.24361	0.974694	2.2183	1.98347	2.38583	2.34563	0.148735	50.2222
P00519	Abl	TK	Abl	0.910001	0.974694	1.8847	1.88127	2.32569	2.34139	0.181109	44.8889
P08069	IGF1R	TK	InsR	0.802013	0.974694	1.77671	1.81633	2.59016	2.54615	0.235856	11.4444
H0Y8A4	RYK	TK	Ryk	0.78574	0.974694	1.76043	1.77604	2.80425	2.83027	0.100656	5.22222
Q14289	FAK2	TK	Fak	0.75162	0.974694	1.72631	1.75985	2.33536	2.30051	0.107246	31.8889
P08922	Ros	TK	Sev	0.704076	0.974694	1.67877	1.72009	2.84941	2.93752	0.176213	3.25
P08581	Met	TK	Met	0.849707	0.974694	1.8244	1.69139	2.42283	2.32749	0.255721	28.2222
P42679	CTK	TK	Csk	0.668943	0.974694	1.64364	1.65663	2.34819	2.29766	0.14223	27
P21860	HER3	TK	EGFR	0.795107	0.974694	1.7698	1.65247	2.2794	2.2335	0.138701	44.5556
P16591	Fer	TK	Fer	0.404943	0.974694	1.37964	1.53065	2.20183	2.6016	0.556125	7
P43403	ZAP70	TK	Syk	0.417939	0.974694	1.39263	1.40415	2.12715	2.12458	0.0337011	58.2222
P14616	IRR	TK	InsR	0.415434	0.974694	1.39013	1.36831	2.31872	2.26924	0.0857037	4.33333
P43405	Syk	TK	Syk	0.495552	0.974694	1.47025	1.36831	2.14222	2.1182	0.0668673	67.1111
P42685	FRK	TK	Src	0.44996	0.974694	1.42465	1.3556	2.13013	2.12091	0.0854074	41
P04629	TRKA	TK	Trk	0.389613	0.974694	1.36431	1.34733	2.18661	2.14221	0.0955731	13.6667
Q16620	TRKB	TK	Trk	0.301857	0.974694	1.27655	1.33124	2.03669	2.08479	0.152409	20.1111
P10721	Kit	TK	PDGFR	0.311046	0.974694	1.28574	1.32148	2.07185	2.08354	0.280984	13
P09619	PDGFR[beta]	TK	PDGFR	0.353861	0.974694	1.32856	1.31956	2.14237	2.11215	0.103695	15.4444
Q12866	Mer	TK	Axl	0.405269	0.974694	1.37996	1.30631	2.12184	2.08582	0.157365	42.6667
P21709	EphA1	TK	Eph	0.330123	0.974694	1.30482	1.30482	2.02074	2.02074	0.963198	4
P29317	EphA2	TK	Eph	0.210852	0.871645	1.0825	1.24069	1.7396	2.07785	0.512386	4.44444
P22455	FGFR4	TK	FGFR	0.276125	0.974694	1.25082	1.23118	1.97992	2.04536	0.240702	15.3333
Q16288	TRKC	TK	Trk	0.283844	0.974694	1.25854	1.21427	2.02255	1.98988	0.135521	19
Q04912	Ron	TK	Met	0.235323	0.974694	1.21002	1.20977	1.92427	1.97014	0.169635	7.33333
Q06418	Tyro3/Sky	TK	Axl	0.207633	0.974694	1.18233	1.18371	1.98074	1.99303	0.0623954	40.1111
Q05397	FAK1	TK	Fak	0.20251	0.974694	1.1772	1.14992	1.94638	1.95202	0.117062	40.3333
P35968	KDR	TK	VEGFR	0.2885	0.974694	1.26319	1.14862	2.02349	1.8887	0.251621	17
P41240	CSK	TK	Csk	0.159249	0.974694	1.13394	1.14219	1.92283	1.98422	0.118009	39.1111
Q9UM73	ALK	TK	Alk	0.230653	0.974694	1.20535	1.13208	1.92354	1.95827	0.226832	43.3333
Q06187	BTK	TK	Tec	0.168154	0.974694	1.14285	1.12589	1.83172	1.8628	0.272593	14.3333
P51813	Etk/BMX	TK	Tec	0.167548	0.974694	1.14224	1.12344	1.90254	1.89194	0.136441	27.5556
P29376	LTK	TK	Alk	0.146107	0.974694	1.1208	1.12042	1.79481	1.81409	0.245783	16
P42680	TEC	TK	Tec	0.137379	0.974694	1.11207	1.10782	1.85738	1.88928	0.139439	33.1111
Q13882	Brk	TK	Src	0.151469	0.974694	1.12616	1.10546	1.97755	1.97035	0.0568968	64
J3KPB5	EphA10	TK	Eph	0.125044	0.974694	1.09974	1.0956	1.4419	1.4419	0	3
P22607	FGFR3	TK	FGFR	0.168083	0.974694	1.14278	1.09274	1.72714	1.61125	0.242475	6.88889
Q9H3Y6	Srm	TK	Src	0.105518	0.974694	1.08021	1.09274	1.85605	1.90944	0.0681186	33.3333
P21802	FGFR2	TK	FGFR	0.165124	0.974694	1.13982	1.0882	1.74849	1.66441	0.236522	7.88889
P46734	MKK3/MAP2K3	STE	STE7	0.105491	0.974694	1.08019	1.07817	1.425	1.425	0	5
P52564	MKK6/MAP2K6	STE	STE7	0.105491	0.974694	1.08019	1.07817	1.425	1.425	0	5
P07333	FmS/CSFR	TK	PDGFR	0.111834	0.833813	0.945647	1.07215	1.47197	1.53217	0.404207	7.125
P52333	JAK3	TK	JakA	0.0929192	0.974694	1.06761	1.06728	1.24812	1.24812	0	3
P36888	FLT3	TK	PDGFR	0.066057	0.892301	0.958358	1.05877	1.36699	1.54584	0.397832	10.5714
P07332	Fes	TK	Fer	0.113381	0.974694	1.08807	1.04835	1.6391	1.49324	0.248854	9.77778
P04626	HER2	TK	EGFR	0.0747409	0.974694	1.04944	1.0463	1.75437	1.70517	0.12379	32.1111
P00533	EGFR	TK	EGFR	0.0621311	0.974694	1.03683	1.02628	1.76847	1.76281	0.157797	42.2222
P42681	TXK	TK	Tec	0.0911829	0.974694	1.06588	1.02628	1.69897	1.69815	0.193692	22.6667
O60674	JAK2	TK	JakA	0.0405012	0.974694	1.0152	1.02142	1.44852	1.42967	0.0463968	14.5556
P11362	FGFR1	TK	FGFR	0.0788058	0.871645	0.950451	1.01661	1.52521	1.50813	0.179156	11.4444
Q15303	HER4	TK	EGFR	0.150975	0.974694	1.12567	1.00808	1.83621	1.74468	0.323086	27.7778
P07949	Ret	TK	Ret	0.0394675	0.974694	1.01416	0.995146	1.44562	1.35712	0.239848	19.2222
Q08881	ITK	TK	Tec	0.000678191	0.940344	0.941023	0.974694	1.21827	1.23516	0.0955117	32
Q02750	MEK1/MAP2K1	STE	STE7	0.0808744	0.665546	0.746421	0.745423	1.28379	1.28379	0	5
P54764	EphA4	TK	Eph	0.0648866	0.665546	0.730433	0.732059	1.01391	1.01391	0	3
O14733	MAP2K7	STE	STE7	0.015432	0.665546	0.680978	0.681469	0.698336	0.698336	0	6
P45985	SEK1/MAP2K4	STE	STE7	0.0155262	0.665546	0.681072	0.681469	0.816832	0.816832	0	7
P54756	EphA5	TK	Eph	0.0705811	0.540608	0.611189	0.611189	1.0407	1.0407	NA	3
O95382	MEKK6/MAP3K6	STE	STE11	0.0245514	0.505845	0.530397	0.531795	0.59094	0.59094	0	4
Q99683	ASK/MAP3K5	STE	STE11	0.0245514	0.505845	0.530397	0.531795	0.59094	0.59094	0	4
P23458	JAK1~b	TK	JakA	0.0223116	0.47151	0.493822	0.518506	0.755468	0.81091	0.110883	5.5
P17948	FLT1	TK	VEGFR	0	0.122407	0.122407	0.103474	0.137965	0.0324076	0.187491	12.7778
P35916	FLT4	TK	VEGFR	0.00213688	0.110434	0.112571	0.0485614	-0.0769554	-0.0535012	0.252142	6.22222
P54762	EphB1	TK	Eph	0.00512216	0.0400052	0.0451273	0.0461282	0.15358	0.15358	0	3
