# Supplementary material for: Targeting ERBB3 and AKT to overcome adaptive resistance in EML4-ALK-driven non-small cell lung cancer
Source: Cell Death Dis. 2024 Dec 18;15(12):912. doi: 10.1038/s41419-024-07272-7 (PMC11655848; doi:10.1038/s41419-024-07272-7)
Supplement: Supplementary file 7 — Dataset 4 [file 41419_2024_7272_MOESM7_ESM.xlsx]

## Sheet: UKA_PTK_03_H2228 T3 vs C-UKAv20
Kinase Uniprot ID	Kinase Name	Kinase Group	Kinase Family	Mean Specificity Score	Mean Significance Score	Mean Final Score	Median Final score	Mean Kinase Statistic	Median Kinase Statistic	SD Kinase Statitistic	Mean peptide set size
Q06418	Tyro3/Sky	TK	Axl	1.42525	0.974694	2.39994	2.46954	2.0959	2.06551	0.154859	40.3333
Q01973	ROR1	TK	Ror	1.4648	0.974694	2.43949	2.43949	3.82664	3.82664	0	3
P04629	TRKA	TK	Trk	1.00424	0.974694	1.97893	2.0716	2.23898	2.21979	0.14638	14.3333
P22455	FGFR4	TK	FGFR	1.08178	0.974694	2.05647	2.02045	2.44203	2.26085	0.643326	14.3333
H0Y8A4	RYK	TK	Ryk	0.911801	0.931107	1.84291	1.97469	2.53801	2.76642	0.571749	4.85714
P08581	Met	TK	Met	0.942192	0.974694	1.91689	1.92548	2.06475	2.03427	0.191625	27.6667
P29376	LTK	TK	Alk	0.828843	0.974694	1.80354	1.90281	2.20361	2.14519	0.432446	16.2222
P08922	Ros	TK	Sev	1.09665	0.974694	2.07134	1.8778	3.10461	2.87552	0.458183	3.25
P30530	Axl	TK	Axl	0.757259	0.974694	1.73195	1.77057	1.84854	1.83939	0.0665886	53.5556
P04626	HER2	TK	EGFR	0.949603	0.974694	1.9243	1.73414	2.0335	2.04576	0.258039	29.2222
P43403	ZAP70	TK	Syk	0.667797	0.974694	1.64249	1.70518	1.81013	1.8357	0.0840388	54
P21860	HER3	TK	EGFR	0.701317	0.974694	1.67601	1.64836	1.87855	1.96195	0.132431	41.6667
P06213	InSR	TK	InsR	0.702264	0.974694	1.67696	1.60178	1.98405	1.99368	0.111788	18.6667
P08631	HCK	TK	Src	0.581114	0.974694	1.55581	1.5873	1.92115	1.92508	0.0932257	19.1111
Q16288	TRKC	TK	Trk	0.548229	0.974694	1.52292	1.58376	1.87559	1.91962	0.120815	19.5556
Q04912	Ron	TK	Met	0.606485	0.974694	1.58118	1.50931	2.13967	1.97243	0.426753	7.88889
P08069	IGF1R	TK	InsR	0.4678	0.974694	1.44249	1.45095	1.71567	1.90502	0.400495	13
P22607	FGFR3	TK	FGFR	0.410148	0.974694	1.38484	1.43063	1.77636	1.8542	0.210461	6.88889
Q12866	Mer	TK	Axl	0.554745	0.974694	1.52944	1.41359	1.80114	1.73802	0.155132	41
P41240	CSK	TK	Csk	0.487437	0.974694	1.46213	1.40885	1.74489	1.7594	0.124183	34.7778
Q16620	TRKB	TK	Trk	0.349001	0.974694	1.32369	1.40415	1.69726	1.76926	0.141273	20.3333
P16234	PDGFR[alpha]	TK	PDGFR	0.426167	0.974694	1.40086	1.39951	1.84542	1.86128	0.0475591	4.11111
P06241	Fyn	TK	Src	0.428577	0.974694	1.40327	1.38363	1.7757	1.75003	0.0684158	22.2222
P07947	Yes	TK	Src	0.405039	0.974694	1.37973	1.3792	1.75422	1.75949	0.063474	23
P09769	Fgr	TK	Src	0.375918	0.974694	1.35061	1.37047	1.73474	1.7921	0.0989635	8.22222
P12931	Src	TK	Src	0.373583	0.974694	1.34828	1.33322	1.7011	1.72529	0.0456386	41.4444
P43405	Syk	TK	Syk	0.323105	0.974694	1.2978	1.33322	1.67432	1.69728	0.0475874	64.4444
O14757	CHK1	CAMK	CAMKL	0.347551	0.974694	1.32224	1.32731	1.71668	1.71668	0	3
P46734	MKK3/MAP2K3	STE	STE7	0.347914	0.974694	1.32261	1.32536	1.69429	1.69429	0	4
P52564	MKK6/MAP2K6	STE	STE7	0.347914	0.974694	1.32261	1.32536	1.69429	1.69429	0	4
P21802	FGFR2	TK	FGFR	0.331976	0.974694	1.30667	1.29345	1.62689	1.56226	0.249703	7.88889
Q9UM73	ALK	TK	Alk	0.280299	0.974694	1.25499	1.27746	1.6102	1.67897	0.144824	43.2222
P07948	Lyn	TK	Src	0.28265	0.974694	1.25734	1.27226	1.55729	1.67406	0.261097	20.5556
P11362	FGFR1	TK	FGFR	0.34995	0.974694	1.32464	1.26036	1.67715	1.5952	0.18034	12.1111
P42679	CTK	TK	Csk	0.349416	0.974694	1.32411	1.26036	1.69146	1.68398	0.16853	26.8889
P06239	Lck	TK	Src	0.332793	0.974694	1.30749	1.25206	1.68108	1.63533	0.07816	26.3333
P21709	EphA1	TK	Eph	0.274506	0.974694	1.2492	1.2492	1.44985	1.44985	0.751026	4
P51451	BLK	TK	Src	0.351432	0.974694	1.32613	1.24715	1.65316	1.61767	0.13198	20.5556
Q13882	Brk	TK	Src	0.374422	0.974694	1.34912	1.24391	1.69603	1.65787	0.0864801	61.2222
P42684	Arg	TK	Abl	0.221564	0.974694	1.19626	1.24069	1.58873	1.64861	0.101665	46.7778
Q15303	HER4	TK	EGFR	0.28687	0.974694	1.26156	1.22651	1.62019	1.59521	0.244025	25.1111
Q05397	FAK1	TK	Fak	0.257949	0.974694	1.23264	1.21427	1.58954	1.62993	0.158086	37.8889
P42680	TEC	TK	Tec	0.299774	0.974694	1.27447	1.20532	1.64273	1.5812	0.201669	32.8889
Q14289	FAK2	TK	Fak	0.249441	0.974694	1.22413	1.18511	1.60235	1.58847	0.108917	30.2222
Q9H3Y6	Srm	TK	Src	0.197494	0.974694	1.17219	1.16581	1.55932	1.56894	0.0554604	32.3333
P51813	Etk/BMX	TK	Tec	0.189167	0.974694	1.16386	1.16178	1.51722	1.56858	0.106972	26.7778
P00533	EGFR	TK	EGFR	0.181545	0.974694	1.15624	1.16045	1.56365	1.56332	0.0329695	37.3333
P14616	IRR	TK	InsR	0.167876	0.974694	1.14257	1.15319	1.28601	1.33986	0.123376	4.75
P42681	TXK	TK	Tec	0.157345	0.974694	1.13204	1.13837	1.42902	1.5379	0.161603	22.5556
P36888	FLT3	TK	PDGFR	0.148954	0.81936	0.968314	1.13333	1.15349	1.45481	0.498682	9
P09619	PDGFR[beta]	TK	PDGFR	0.169786	0.974694	1.14448	1.11978	1.42571	1.36947	0.0935071	13.4444
Q06187	BTK	TK	Tec	0.13381	0.974694	1.1085	1.11256	1.33583	1.33956	0.161798	13.3333
P16591	Fer	TK	Fer	0.0783618	0.92291	1.00127	1.06728	0.972877	1.02235	0.153519	6.55556
P07332	Fes	TK	Fer	0.0872496	0.974694	1.06194	1.05249	1.11136	1.12321	0.182464	9.11111
P10721	Kit	TK	PDGFR	0.243862	0.974694	1.21856	1.04528	1.48403	1.20907	0.505974	10
P52333	JAK3	TK	JakA	0.0673872	0.974694	1.04208	1.04222	0.696245	0.696245	0	3
P45985	SEK1/MAP2K4	STE	STE7	0.0639047	0.974694	1.0386	1.03818	0.904736	0.904736	0	6
P07949	Ret	TK	Ret	0.0642252	0.974694	1.03892	1.02923	1.20376	1.18719	0.0582858	17.2222
P07333	FmS/CSFR	TK	PDGFR	0.0593818	0.85818	0.917562	1.02436	0.83054	0.982746	0.290613	6.75
P00519	Abl	TK	Abl	0.0481354	0.974694	1.02283	1.02336	1.34744	1.38341	0.104235	42.4444
P42685	FRK	TK	Src	0.0411929	0.974694	1.01589	1.01091	1.32237	1.23898	0.130941	41.7778
Q08881	ITK	TK	Tec	0.023457	0.974694	0.998151	0.998803	1.18111	1.19974	0.120351	31
O60674	JAK2	TK	JakA	0.0117644	0.974694	0.986459	0.987028	0.84087	0.899041	0.121202	14.5556
P35968	KDR	TK	VEGFR	0.0395877	0.974694	1.01428	0.986135	1.03603	0.9461	0.194608	17
O95382	MEKK6/MAP3K6	STE	STE11	0.0132392	0.294136	0.307375	0.30647	0.15002	0.15002	0	3
Q99683	ASK/MAP3K5	STE	STE11	0.0132392	0.294136	0.307375	0.30647	0.15002	0.15002	0	3
O14733	MAP2K7	STE	STE7	0.00848581	0.294136	0.302622	0.302025	-0.222514	-0.222514	0	5
J3KPB5	EphA10	TK	Eph	0.0188029	0.213249	0.232051	0.231883	0.237219	0.237219	0	3
P17948	FLT1	TK	VEGFR	0.000290013	0.288228	0.288518	0.210419	0.18382	0.196241	0.320084	11.6667
P23458	JAK1~b	TK	JakA	0.00982579	0.180535	0.19036	0.146157	-0.160574	-0.0716755	0.177798	4.5
Q02750	MEK1/MAP2K1	STE	STE7	0.0049582	0.0840728	0.089031	0.0884376	0.0757735	0.0757735	0	4
P35916	FLT4	TK	VEGFR	0.0104006	0.237541	0.247941	0.0505046	0.0970197	-0.0734353	0.287066	5.55556
P54764	EphA4	TK	Eph	0.00437191	0.047692	0.0520639	0.0503056	-0.0305154	-0.0305154	0	3
P54756	EphA5	TK	Eph	0.00261362	0.032452	0.0350656	0.0350656	0.0665774	0.0665774	NA	3
P29317	EphA2	TK	Eph	0.00535318	0.0980454	0.103399	0.00612309	-0.0743682	-0.0570481	0.127263	4.44444
